# Supplementary material
Source: Springer Nature journal article supplement (http://www.springermedizin.de/resource/supplementary/13014_2009_219_MOESM1_ESM.pdf/9633202)

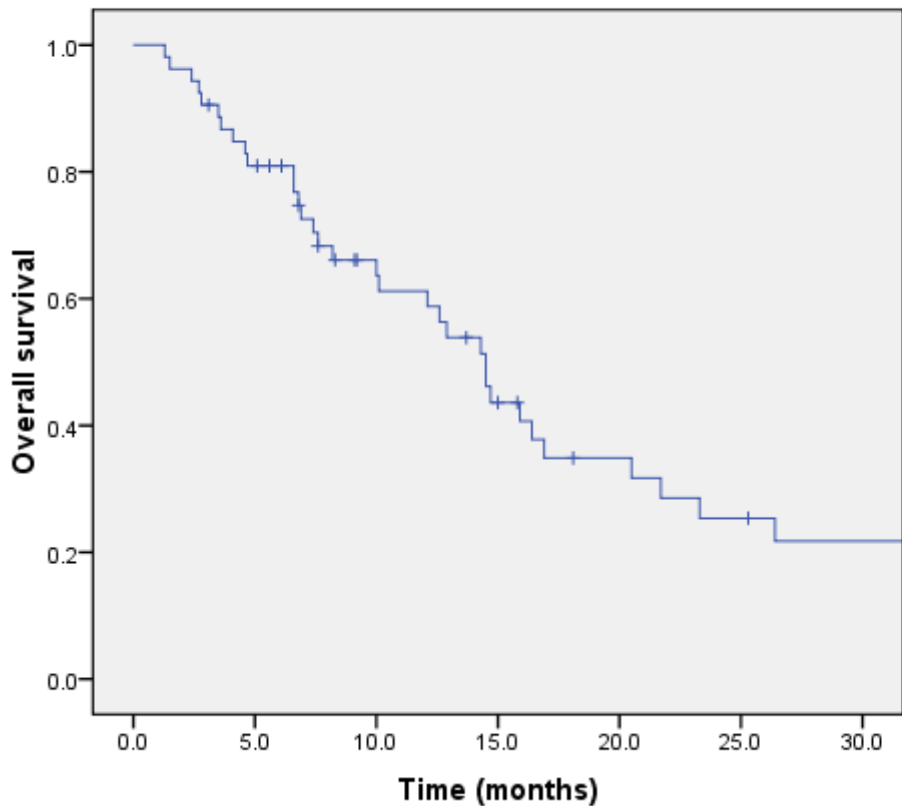

Supplement: MOESM1 [file 9633202]
